# Supplementary material for: Genetic code expansion enables visualization of Salmonella type three secretion system components and secreted effectors
Source: eLife. 2021 Jun 1;10:e67789. doi: 10.7554/eLife.67789 (PMC8192122; doi:10.7554/eLife.67789)
Supplement: Figure 2—figure supplement 5—source data 1. [file elife-67789-fig2-figsupp5-data1.xlsx]

## Sheet: Sheet1
	Experimental Set 1
		ROIs	Number of cell with polarly localized SsaP	Total number of cell per ROI	Fractions of polarly localized SsaP cell per ROI
		1	8	80	0.1
		2	4	79	0.0506329
		3	8	62	0.129032
		4	6	63	0.0952381
		5	9	47	0.191489
		6	6	36	0.166667
	Experimental Set 2
		ROIs	Number of cell with polarly localized SsaP	Total number of cell per ROI	Fractions of polarly localized SsaP cell per ROI
		1	7	36	0.194444
		2	7	40	0.175
		3	9	41	0.219512
		4	8	38	0.210526
		5	4	26	0.153846
		6	5	35	0.142857
	Experimental Set 3
		ROIs	Number of cell with polarly localized SsaP	Total number of cell per ROI	Fractions of polarly localized SsaP cell per ROI
		1	5	45	0.111111
		2	7	44	0.159091
		3	5	41	0.121951
		4	10	77	0.12987
		5	5	28	0.178571
		6	3	22	0.136364
		7	5	51	0.0980392
