# Supplementary material for: Genetic code expansion enables visualization of Salmonella type three secretion system components and secreted effectors
Source: eLife. 2021 Jun 1;10:e67789. doi: 10.7554/eLife.67789 (PMC8192122; doi:10.7554/eLife.67789)
Supplement: Figure 3—figure supplement 1—source data 1. [file elife-67789-fig3-figsupp1-data1.xlsx]

## Sheet: Source file of S5A
OD@600 nm Measurement
Time (min)	WT-Salmonella OD@600 nm	WT-Salmonella OD	WT-Salmonella OD@600 nm	WT (plus pEVOL) OD@600 nm	WT (plus pEVOL) OD@600 nm	WT (plus pEVOL) OD@600 nm	sifA(pEVOL+SifA52TAG) OD@600 nm	sifA(pEVOL+SifA52TAG) OD@600 nm	sifA(pEVOL+SifA52TAG) OD@600 nm
30	0.0357	0.0469	0.0539	0.0746	0.058	0.05	0.047	0.0408	0.051
60	0.13	0.0102	0.015	0.087	0.0802	0.082	0.102	0.2032	0.11
90	0.438	0.035	0.41	0.3571	0.4	0.45	0.475	0.332	0.041
120	0.738	0.752	0.698	0.644	0.746	0.912	0.522	0.61	0.55
150	1.185	1.2	1.01	0.895	0.899	0.91	0.613	0.65	0.61
180	1.48	1.42	1.78	1.56	1.53	1.33	0.68	1.11	1.34
210	1.79	1.825	2	1.47	1.52	1.77	1.49	1.83	1.615
240	2.218	2.24	2.152	2.248	2.149	2.315	1.454	2	1.64
270	2.81	2.74	2.75	2.63	2.58	2.6	2.18	2.22	2.37
300	2.72	2.88	2.85	2.85	2.87	2.72	2.42	2.31	2.38
330	3.18	3.095	3.08	3.3	3.33	3.267	2.57	3	2.88
360	2.99	3.01	3	3.74	3.14	3.33	3.22	3.33	3.4
390	3.178	3.2	3.052	3.33	3.3	3.37	3.192	3.174	3.01
410	2.85	3.65	3.22	3.765	3.09	3.33	3.22	2.83	3.8
