# Supplementary material for: Genetic code expansion enables visualization of Salmonella type three secretion system components and secreted effectors
Source: eLife. 2021 Jun 1;10:e67789. doi: 10.7554/eLife.67789 (PMC8192122; doi:10.7554/eLife.67789)
Supplement: Figure 3—figure supplement 1—source data 2. [file elife-67789-fig3-figsupp1-data2.xlsx]

## Sheet: Exp-6
	WT
													16h/2h	fold change								16h/2h	normalized					16h/2h	percentage
	2h								WT 16h/2h				WT	12.77								WT	1					WT	100
		undiluted	-1	-2		avg			12.77				WT+plasmid	9.45								WT+plasmid	0.74					WT+plasmid	74
	1	uc	uc	74/74	370000	295000
	2	uc	uc	60/53	282500
	3	uc	uc	49/44	232500
	16h
		un	-1	-2	-3	-4	-5		-3	-4	avg	avg
	1	uc	uc	uc	57/47	4,9	nd		2600000	3250000	2000000	3770000
	2	uc	uc	uc	93/87	8,16	nd		4600000	6000000	5300000
	3	uc	uc	uc	60/61	12,8	nd		3025000	5000000	4015000
	WT+plasmid
									WT+plasmid 16h/2h
	2h								9.45
		undiluted	-1	-2		avg
	1	uc	uc	37/42	197500	199000
	2	uc	uc	40/45	212500
	3	uc	uc	40/35	187500
	16h
		undiluted	-1	-2	-3	-4	-5		-3	-4	avg	avg
	1	uc	uc	uc	28/33	5,3	nd		1525000	2000000	1765000	1880000
	2	uc	uc	uc	34/32	4,3	nd		1650000	1750000	1700000
	3	uc	uc	uc	29/46	6,4	nd		1875000	2500000	2190000
