# Supplementary material for: Genetic code expansion enables visualization of Salmonella type three secretion system components and secreted effectors
Source: eLife. 2021 Jun 1;10:e67789. doi: 10.7554/eLife.67789 (PMC8192122; doi:10.7554/eLife.67789)
Supplement: Figure 3—figure supplement 4—source data 1. [file elife-67789-fig3-figsupp4-data1.xlsx]

## Sheet: Sheet1
	Fraction of cell displaying the phenotype
	Experimental Sets			Total of Number of ROIs	Total Number of LAMP1 positive cells for WT	Total number of cells counted	Fractions of cells
	1			15	27	41	0.658537
	2			20	27	49	0.55102
	3			16	31	53	0.584906
	Experimental Sets			Total of Number of ROIs	Total Number of LAMP1 positive cells for sifA (psifA52TAG+pEVOL)	Total number of cells counted	Fractions of cells
	1			16	37	70	0.528571
	2			16	22	42	0.52381
	3			16	32	69	0.463768
	Experimental Sets			Total of Number of ROIs	Total Number of SIFs containing labeled SifA [sifA (psifA52TAG+pEVOL) lebeled with click	Total number of cells counted	Fractions of cells
				14	31	57	0.54386
				14	21	53	0.396226
				16	18	29	0.461538
