# Supplementary material for: Genetic code expansion enables visualization of Salmonella type three secretion system components and secreted effectors
Source: eLife. 2021 Jun 1;10:e67789. doi: 10.7554/eLife.67789 (PMC8192122; doi:10.7554/eLife.67789)
Supplement: Figure 3—figure supplement 5—source data 1. [file elife-67789-fig3-figsupp5-data1.xlsx]

## Sheet: Sheet1
	Fraction of cell showing colocalization
	Experimental Sets			Total of Number of ROIs	Number of labeled SifA colocalized with LAMP1	Total number of cells counted	Fractions of cells
	1			9	11	27	0.407407
	2			5	9	37	0.243243
	3			5	7	15	0.466667
