# Supplementary material for: Genetic code expansion enables visualization of Salmonella type three secretion system components and secreted effectors
Source: eLife. 2021 Jun 1;10:e67789. doi: 10.7554/eLife.67789 (PMC8192122; doi:10.7554/eLife.67789)
Supplement: Figure 4—figure supplement 1—source data 1. [file elife-67789-fig4-figsupp1-data1.xlsx]

## Sheet: Sheet1
	Fraction of cell showing colocalization
	Experimental Sets			Total of Number of ROIs	Number of cell where SifA colocalized with SseJ-HA	Total number of cells counted	Fractions of cells
	1			12	16	27	0.592593
	2			11	11	31	0.354839
	3			8	6	23	0.26087
	Experimental Sets			Total of Number of ROIs	Number of cell where SifA colocalized with Kinesin	Total number of cells counted	Fractions of cells
	1			4	11	27	0.407407
	2			5	11	22	0.5
	3			4	13	32	0.40625
