# Supplementary material for: Genetic code expansion enables visualization of Salmonella type three secretion system components and secreted effectors
Source: eLife. 2021 Jun 1;10:e67789. doi: 10.7554/eLife.67789 (PMC8192122; doi:10.7554/eLife.67789)
Supplement: Figure 4—source data 1. [file elife-67789-fig4-data1.xls]

## Sheet: Sheet1
Mander's colocalization analysis between SifA and SseJ								Colocalization analysis of mock-infected cells
Shift_X	Shift_Y	M1						Shift_X	Shift_Y	M1
-30	-30	0.02652						-30	-30	0.00147
-30	-25	0.06025						-30	-25	0.00586
-30	-20	0.0501						-30	-20	0.00973
-30	-15	0.05384						-30	-15	0.00938
-30	-10	0.06001						-30	-10	0.01367
-30	-5	0.02999						-30	-5	0.02061
-30	0	0.02391						-30	0	0.00862
-30	5	0.01438						-30	5	0.00477
-30	10	0.00818						-30	10	0.00409
-30	15	0.00887						-30	15	0.01224
-30	20	0.01043						-30	20	0.01377
-30	25	0.03016						-30	25	0.00605
-30	30	0.02408						-30	30	0.00341
-25	-30	0.02081						-25	-30	0.00445
-25	-25	0.04289						-25	-25	0.01127
-25	-20	0.02429						-25	-20	0.01612
-25	-15	0.03514						-25	-15	0.00871
-25	-10	0.0406						-25	-10	0.01342
-25	-5	0.02163						-25	-5	0.01555
-25	0	0.0287						-25	0	0.02968
-25	5	0.0241						-25	5	0.021
-25	10	0.01295						-25	10	0.00425
-25	15	0.02362						-25	15	0.01063
-25	20	0.02207						-25	20	0.01347
-25	25	0.02365						-25	25	0.00507
-25	30	0.01988						-25	30	0.00425
-20	-30	0.0095						-20	-30	0.00712
-20	-25	0.02225						-20	-25	0.01029
-20	-20	0.02801						-20	-20	0.00871
-20	-15	0.02839						-20	-15	0.00154
-20	-10	0.03059						-20	-10	0.01439
-20	-5	0.04463						-20	-5	0.0104
-20	0	0.04379						-20	0	0.01438
-20	5	0.02675						-20	5	0.00494
-20	10	0.02655						-20	10	0.00735
-20	15	0.01924						-20	15	0.01183
-20	20	0.03106						-20	20	0.01585
-20	25	0.01773						-20	25	0.01177
-20	30	0.01099						-20	30	0.00551
-15	-30	0.01746						-15	-30	0.01636
-15	-25	0.03017						-15	-25	0.00574
-15	-20	0.02672						-15	-20	0.0061
-15	-15	0.02297						-15	-15	0.01381
-15	-10	0.02195						-15	-10	0.02645
-15	-5	0.04731						-15	-5	0.01739
-15	0	0.03277						-15	0	0.02734
-15	5	0.01378						-15	5	0.00683
-15	10	0.03454						-15	10	0.0091
-15	15	0.02536						-15	15	0.00848
-15	20	0.02631						-15	20	0.01718
-15	25	0.01664						-15	25	0.01194
-15	30	0.01489						-15	30	0.00609
-10	-30	0.02096						-10	-30	0.01969
-10	-25	0.02834						-10	-25	0.00818
-10	-20	0.02666						-10	-20	0.00601
-10	-15	0.01396						-10	-15	0.01892
-10	-10	0.00942						-10	-10	0.00845
-10	-5	0.01663						-10	-5	0.01255
-10	0	0.01577						-10	0	0.01554
-10	5	0.02583						-10	5	0.01248
-10	10	0.0264						-10	10	0.01254
-10	15	0.03673						-10	15	0.01114
-10	20	0.03229						-10	20	0.00692
-10	25	0.01724						-10	25	0.00284
-10	30	0.01669						-10	30	0.00715
-5	-30	0.01569						-5	-30	0.02968
-5	-25	0.01841						-5	-25	0.00899
-5	-20	0.01201						-5	-20	0.00632
-5	-15	0.01967						-5	-15	0.01598
-5	-10	0.01292						-5	-10	0.02
-5	-5	0.03903						-5	-5	0.02376
-5	0	0.07027						-5	0	0.02938
-5	5	0.0458						-5	5	0.01483
-5	10	0.02855						-5	10	0.0133
-5	15	0.03534						-5	15	0.01576
-5	20	0.02476						-5	20	0.01703
-5	25	0.02998						-5	25	0.01139
-5	30	0.02294						-5	30	0.00607
0	-30	0.03661						0	-30	0.02421
0	-25	0.03052						0	-25	0.01361
0	-20	0.01388						0	-20	0.01194
0	-15	0.02388						0	-15	0.01851
0	-10	0.03607						0	-10	0.02532
0	-5	0.08541						0	-5	0.01211
0	0	0.2911						0	0	0.01816
0	5	0.09832						0	5	0.01142
0	10	0.04011						0	10	0.01303
0	15	0.04026						0	15	0.00731
0	20	0.03192						0	20	0.01659
0	25	0.0465						0	25	0.00254
0	30	0.05012						0	30	0.00549
5	-30	0.00734						5	-30	0.00409
5	-25	0.03182						5	-25	0.01515
5	-20	0.02096						5	-20	0.00669
5	-15	0.03327						5	-15	0.00906
5	-10	0.03433						5	-10	0.00717
5	-5	0.05406						5	-5	0.02623
5	0	0.11276						5	0	0.01171
5	5	0.04208						5	5	0.0112
5	10	0.03549						5	10	0.01253
5	15	0.03123						5	15	0.00523
5	20	0.03111						5	20	0.00904
5	25	0.02774						5	25	0.00507
5	30	0.0292						5	30	0.0033
10	-30	0.01444						10	-30	0.01775
10	-25	0.01853						10	-25	0.00108
10	-20	0.02972						10	-20	0.01023
10	-15	0.05048						10	-15	0.00785
10	-10	0.03924						10	-10	0.01201
10	-5	0.02285						10	-5	0.0105
10	0	0.02363						10	0	0.00144
10	5	0.0186						10	5	0.01012
10	10	0.02568						10	10	0.03053
10	15	0.03554						10	15	0.00958
10	20	0.03183						10	20	0.00728
10	25	0.03305						10	25	0.00499
10	30	0.03532						10	30	0.00251
15	-30	0.01968						15	-30	0.01231
15	-25	0.02835						15	-25	0.0077
15	-20	0.01731						15	-20	0.00901
15	-15	0.02448						15	-15	0.00893
15	-10	0.03172						15	-10	0.01081
15	-5	0.01816						15	-5	0.01114
15	0	0.01947						15	0	0.00909
15	5	0.03225						15	5	0.0008925
15	10	0.01966						15	10	0.00131
15	15	0.03434						15	15	0.0068
15	20	0.03018						15	20	0.00134
15	25	0.03136						15	25	0.00192
15	30	0.03459						15	30	0.00632
20	-30	0.01647						20	-30	0.04596
20	-25	0.02183						20	-25	0.00354
20	-20	0.0268						20	-20	0.00457
20	-15	0.01169						20	-15	0.00355
20	-10	0.02066						20	-10	0.00815
20	-5	0.01791						20	-5	0.00605
20	0	0.02023						20	0	0.01446
20	5	0.04003						20	5	0.00664
20	10	0.03424						20	10	0.00839
20	15	0.03072						20	15	0.0041
20	20	0.02121						20	20	0.01552
20	25	0.01195						20	25	0.00673
20	30	0.01175						20	30	0
25	-30	0.02551						25	-30	0.00257
25	-25	0.02611						25	-25	0.0053
25	-20	0.02719						25	-20	0.01754
25	-15	0.01989						25	-15	0.00727
25	-10	0.03014						25	-10	0.00667
25	-5	0.01339						25	-5	0.00451
25	0	0.0177						25	0	0.00446
25	5	0.0214						25	5	0.00875
25	10	0.04041						25	10	0.00856
25	15	0.02643						25	15	0
25	20	0.01143						25	20	0.00464
25	25	0.0134						25	25	0.00456
25	30	0.00904						25	30	0.00304
30	-30	0.03043						30	-30	0
30	-25	0.03101						30	-25	0.0008715
30	-20	0.02149						30	-20	0.00144
30	-15	0.01801						30	-15	0.00348
30	-10	0.03205						30	-10	0.00219
30	-5	0.02754						30	-5	0.00224
30	0	0.02258						30	0	0.00541
30	5	0.01386						30	5	0.0042
30	10	0.01784						30	10	0.00652
30	15	0.01893						30	15	0.0005625
30	20	0.01476						30	20	0.00598
30	25	0.01539						30	25	0.0108
30	30	0.01006						30	30	0
