# Supplementary material for: Genetic code expansion enables visualization of Salmonella type three secretion system components and secreted effectors
Source: eLife. 2021 Jun 1;10:e67789. doi: 10.7554/eLife.67789 (PMC8192122; doi:10.7554/eLife.67789)
Supplement: Figure 4—source data 2. [file elife-67789-fig4-data2.xls]

## Sheet: Sheet1
Mander's colocalization analyis of SifA and Kinesin								Colocalization analyis of mock-infected cells
Shift_X	Shift_Y	M1						Shift_X	Shift_Y	M1
-30	-30	0.02675						-30	-30	0.00196
-30	-25	0.04943						-30	-25	0.00773
-30	-20	0.04924						-30	-20	0.01254
-30	-15	0.05228						-30	-15	0.00842
-30	-10	0.05931						-30	-10	0.01119
-30	-5	0.04132						-30	-5	0.05006
-30	0	0.04611						-30	0	0.01384
-30	5	0.04072						-30	5	0.00636
-30	10	0.03737						-30	10	0.00545
-30	15	0.03274						-30	15	0.0121
-30	20	0.03888						-30	20	0.0202
-30	25	0.03924						-30	25	0.01316
-30	30	0.0445						-30	30	0.00454
-25	-30	0.02905						-25	-30	0.00599
-25	-25	0.04336						-25	-25	0.01601
-25	-20	0.0458						-25	-20	0.005155
-25	-15	0.04659						-25	-15	0.01162
-25	-10	0.0467						-25	-10	0.0174
-25	-5	0.04049						-25	-5	0.02022
-25	0	0.04005						-25	0	0.00132
-25	5	0.04743						-25	5	0.005493
-25	10	0.07225						-25	10	0.00567
-25	15	0.05127						-25	15	0.01417
-25	20	0.04157						-25	20	0.0144
-25	25	0.04502						-25	25	0.00862
-25	30	0.06046						-25	30	0.00567
-20	-30	0.02318						-20	-30	0.01147
-20	-25	0.0249						-20	-25	0.01372
-20	-20	0.03953						-20	-20	0.00825
-20	-15	0.04346						-20	-15	0.00501
-20	-10	0.03912						-20	-10	0.01823
-20	-5	0.05302						-20	-5	0.0162
-20	0	0.05142						-20	0	0.01403
-20	5	0.05078						-20	5	0.00151
-20	10	0.05606						-20	10	0.00905
-20	15	0.04283						-20	15	0.01202
-20	20	0.04664						-20	20	0.01002
-20	25	0.03827						-20	25	0.01102
-20	30	0.05395						-20	30	0.00501
-15	-30	0.02631						-15	-30	0.01708
-15	-25	0.03091						-15	-25	0.00754
-15	-20	0.03431						-15	-20	0.00699
-15	-15	0.03714						-15	-15	0.02106
-15	-10	0.0425						-15	-10	0.02592
-15	-5	0.05791						-15	-5	0.01892
-15	0	0.05692						-15	0	0.00938
-15	5	0.04728						-15	5	0.00259
-15	10	0.04967						-15	10	0.00839
-15	15	0.05081						-15	15	0.00955
-15	20	0.09171						-15	20	0.01909
-15	25	0.0384						-15	25	0.00937
-15	30	0.04412						-15	30	0.01143
-10	-30	0.03452						-10	-30	0.02372
-10	-25	0.03852						-10	-25	0.00444
-10	-20	0.03457						-10	-20	0.00782
-10	-15	0.02592						-10	-15	0.02681
-10	-10	0.03016						-10	-10	0.00909
-10	-5	0.04267						-10	-5	0.01226
-10	0	0.03941						-10	0	0.02131
-10	5	0.04718						-10	5	0.01262
-10	10	0.04135						-10	10	0.01297
-10	15	0.0664						-10	15	0.01309
-10	20	0.10637						-10	20	0.01054
-10	25	0.03983						-10	25	0.00712
-10	30	0.04878						-10	30	0.00637
-5	-30	0.01978						-5	-30	0.006695
-5	-25	0.03893						-5	-25	0.00884
-5	-20	0.03087						-5	-20	0.00576
-5	-15	0.04923						-5	-15	0.02245
-5	-10	0.03826						-5	-10	0.0267
-5	-5	0.05567						-5	-5	0.01485
-5	0	0.08923						-5	0	0.02039
-5	5	0.07754						-5	5	0.02706
-5	10	0.03916						-5	10	0.02592
-5	15	0.04983						-5	15	0.05357
-5	20	0.04388						-5	20	0.01873
-5	25	0.06941						-5	25	0.00864
-5	30	0.04387						-5	30	0.01076
0	-30	0.03953						0	-30	0.006328
0	-25	0.04059						0	-25	0.02278
0	-20	0.03052						0	-20	0.0199
0	-15	0.04226						0	-15	0.03047
0	-10	0.05199						0	-10	0.02125
0	-5	0.09651						0	-5	0.01917
0	0	0.39173						0	0	0.02948
0	5	0.13821						0	5	0.02365
0	10	0.07496						0	10	0.01505
0	15	0.07708						0	15	0.00682
0	20	0.07125						0	20	0.0183
0	25	0.08877						0	25	0.00215
0	30	0.06264						0	30	0.00645
5	-30	0.0276						5	-30	0.02634
5	-25	0.0401						5	-25	0.01591
5	-20	0.04217						5	-20	0.01281
5	-15	0.05219						5	-15	0.01873
5	-10	0.04568						5	-10	0.01714
5	-5	0.07781						5	-5	0.01656
5	0	0.10607						5	0	0.04915
5	5	0.09619						5	5	0.01893
5	10	0.05615						5	10	0.01263
5	15	0.05137						5	15	0.00315
5	20	0.04193						5	20	0.00789
5	25	0.04492						5	25	0.00454
5	30	0.0467						5	30	0.00217
10	-30	0.02497						10	-30	0.02564
10	-25	0.02965						10	-25	0.02011
10	-20	0.04196						10	-20	0.01284
10	-15	0.05922						10	-15	0.01641
10	-10	0.06602						10	-10	0.0235
10	-5	0.06525						10	-5	0.01899
10	0	0.04574						10	0	0.00512
10	5	0.0578						10	5	0.0178
10	10	0.03952						10	10	0.00954
10	15	0.04185						10	15	0.00512
10	20	0.05137						10	20	0.00652
10	25	0.05408						10	25	0.00414
10	30	0.05024						10	30	0.00533
15	-30	0.03793						15	-30	0.0233
15	-25	0.0434						15	-25	0.01399
15	-20	0.02619						15	-20	0.0162
15	-15	0.03752						15	-15	0.01485
15	-10	0.06796						15	-10	0.0192
15	-5	0.08308						15	-5	0.01465
15	0	0.04511						15	0	0.00989
15	5	0.04783						15	5	0.00217
15	10	0.06371						15	10	0.0059
15	15	0.042						15	15	0.00947
15	20	0.04522						15	20	0.00492
15	25	0.04613						15	25	0.0073
15	30	0.05575						15	30	0.00316
20	-30	0.03714						20	-30	0.00618
20	-25	0.03756						20	-25	0.00865
20	-20	0.03629						20	-20	0.00965
20	-15	0.03307						20	-15	0.00769
20	-10	0.04797						20	-10	0.00986
20	-5	0.05628						20	-5	0.00652
20	0	0.05664						20	0	0.04896
20	5	0.06321						20	5	0.00554
20	10	0.08522						20	10	0.00792
20	15	0.04119						20	15	0.00787
20	20	0.05072						20	20	0.004363
20	25	0.04323						20	25	0.00316
20	30	0.04998						20	30	4e-05
25	-30	0.02796						25	-30	0.00835
25	-25	0.03279						25	-25	0.00974
25	-20	0.03633						25	-20	0.001528
25	-15	0.03895						25	-15	0.00945
25	-10	0.045						25	-10	0.0065
25	-5	0.04977						25	-5	0.00316
25	0	0.05488						25	0	0.00694
25	5	0.05078						25	5	0.00751
25	10	0.05683						25	10	0.0073
25	15	0.04927						25	15	0.000983333
25	20	0.04189						25	20	0.00393
25	25	0.04345						25	25	0.00393
25	30	0.0844						25	30	0.000983333
30	-30	0.0339						30	-30	0.00295
30	-25	0.04474						30	-25	0.00608
30	-20	0.07353						30	-20	0.00412
30	-15	0.06322						30	-15	0.00552
30	-10	0.05949						30	-10	0.00512
30	-5	0.05692						30	-5	0.00533
30	0	0.05682						30	0	0.00435
30	5	0.05423						30	5	0.00316
30	10	0.05282						30	10	0.00217
30	15	0.04784						30	15	0.00197
30	20	0.04243						30	20	0.00652
30	25	0.08445						30	25	0.01485
30	30	0.08291						30	30	0.09805
